# EVALUATING THE CAUSAL RELATIONSHIP BETWEEN EDUCATIONAL ATTAINMENT AND MENTAL HEALTH

**Perline A. Demange<sup>1,2,3</sup>, Dorret I. Boomsma<sup>1,4</sup>, Elsje van Bergen<sup>1,2,3\*</sup>, Michel G. Nivard<sup>1\*</sup>**

<sup>1</sup>Department of Biological Psychology, Vrije Universiteit Amsterdam, The Netherlands

<sup>2</sup>Research Institute LEARN!, Vrije Universiteit Amsterdam, Amsterdam, the Netherlands

<sup>3</sup>Amsterdam Public Health Research Institute, Mental Health, Amsterdam, the Netherlands

<sup>4</sup>Amsterdam Reproduction & Development Research Institute, Amsterdam, the Netherlands

\*equal contribution

## ABSTRACT

We investigate the causal relationship between educational attainment (EA) and mental health using two research designs. First, we compare the relationship between EA and seventeen psychiatric diagnoses within sibship in Dutch national registry data (N = 1.7 million), controlling for unmeasured familial factors. Second, we use two-sample Mendelian Randomization, which uses genetic variants related to EA or psychiatric diagnosis as instrumental variables, to test whether there is a causal relation in either direction. Our results suggest that lower levels of EA causally increase the risk of MDD, ADHD, alcohol dependence, GAD and PTSD diagnoses. We also find evidence of a causal effect in the opposite direction for ADHD. Additionally, we find inconsistent results for schizophrenia, anorexia nervosa, OCD, and bipolar disorder, highlighting the importance of using multiple research designs to understand the complex relationship between EA and mental health.

## INTRODUCTION

Over 17% of the population of the European Union is diagnosed with a mental disorder (2016 estimates, OECD, 2018). Mental diagnoses account for 25% of years lived with disability worldwide<sup>2</sup>. The risk of being diagnosed with a mental disorder is higher among those with

lower educational attainment (EA)<sup>3-5</sup>. If the relationship between education and mental

NOTE: This preprint reports new research that has not been certified by peer review and should not be used to guide clinical practice.

diagnoses is indeed causal, educational policies primarily aimed at improving educational outcomes could also lead to improved mental health.

Most prior studies of the relationship between education and mental health are correlational. This correlation could therefore reflect confounding factors influencing both education and mental health. While known and perfectly measured confounders can be controlled, unknown and unmeasured confounders cannot. Additionally, the correlation between EA and mental health might also be explained by reverse causation, as early onset of mental disorders may hamper subsequent school attendance and performance<sup>6</sup>. Randomized experiments in which education is altered would avoid bias due to confounding or reverse causation, but experiments at the required scale are not feasible for practical and ethical reasons.

As an alternative, we rely on two natural experiments that account for confounding and/or reverse causation in different manners: within-sibship regression and mendelian randomization (MR).

In the Dutch population registry (N = 1.7 million siblings born between 1965 and 1985), we test whether differences in EA between siblings relate to differences in their risk of psychiatric diagnoses between 2011 and 2016. A core assumption of the within-sibship design is that siblings constitute a well-matched case-control group<sup>7,8</sup>. Siblings are comparable for many factors that might play a role in both EA and mental health, for example the family, school, and neighbourhood environment, and 50% of their segregating genome. By comparing siblings, we obtain estimates of the association of education with psychiatric diagnoses and care expenditures, controlled for unmeasured confounders shared by the siblings. While within-sibship estimates can increase or decrease our confidence in the presence of a causal relation, they are insufficient. Confounders not shared between siblings such as differential experiences, 50% of the segregating genome, but also measurement error might bias the estimate<sup>9</sup>. Within-sibship association does not offer evidence of a causal direction, and while timing of events may suggest direction, unmeasured prodromal signs and experiences anterior to graduation might affect the association.

To mitigate the uncertainties introduced by limitations of the within-sibship design, we also apply mendelian randomization (MR). In MR, genetic variants that are robustly associated with the exposure are used as instrumental variables. MR's core assumptions are: (1) some variants are associated with the exposure (EA), (2) these variants are related to mental health only via their effect on educational success, and (3) these variants do not correlate with any

confounders of the relationship between education and mental health<sup>10</sup>. When assumptions are met, MR estimates the causal effect of education on mental health, even in presence of confounding and measurement error<sup>11</sup>. Reverse causation can be empirically evaluated by running two sets of MR analyses: one with variants related to EA as exposure and variants related to psychiatric diagnoses as outcome, and the reverse analysis. We apply two-sample MR<sup>12</sup>, which uses genetic effect estimates from existing well-powered genome-wide association studies (GWASs) of EA<sup>13</sup> and of mental disorders in European-ancestry samples. To minimize the influence of pleiotropy (i.e. one genetic variant affects many traits), we used additional weak-instrument- and pleiotropy-robust MR methods<sup>14–16</sup>. To partly mitigate the influence of assortative mating, population stratification, and gene-environment correlation we performed MR based on genetic associations with EA obtained in a within-sibship GWAS<sup>17</sup>. Mendelian randomization applied to discrete or (ordered) categorical traits, such as EA and mental disorders, has an additional notable caveat: interpretation<sup>18</sup>. If we assume that genetic variants influence categorical variables via their effects on the underlying liability, MR estimates the effect of the liability for higher EA and the liability for being diagnosed, while the within-sibship design estimates the effect of the observed exposure on the risk of the observed outcome.

Only a few prior quasi-causal experiments investigate EA and mental disorders, and found mixed evidence. Studies that compared monozygotic twin pairs with discordant educational outcomes found evidence consistent with a causal association between EA and depressive symptoms<sup>19</sup>, while others did not<sup>20,21</sup>. Similarly, MR studies showed mixed evidence for a negative effect of EA on the risk for depression diagnoses<sup>22–24</sup> but no reverse effect<sup>25</sup>. MR studies suggested a negative effect of EA on ADHD, no effect on PTSD and schizophrenia, but also a positive effect on schizophrenia, bipolar disorder, anorexia, autism and anxiety<sup>26–28</sup>. Within-sibship studies of mental disorders and EA are rare, and even rarer in population registries<sup>29,30</sup>.

The reliance on quasi-causal methods, though preferred over observational association, is still imperfect, and calls for epistemic humility when interpreting or generalizing putative causal association. We reduce uncertainty on the nature of the relation between education and mental health by triangulating across two preregistered quasi-causal methods relying on different underlying assumptions, whose violation would give rise to different biases<sup>31</sup>. Consistent findings strengthen our confidence. Inconsistent findings raise scepticism yet are

also valuable: we interpret these differences in the light of the different assumptions of each method to help us hypothesize on the mechanisms in the relation between education and mental diagnoses.

## RESULTS

In the following, we focus on diagnoses for which GWASs are available. Results for all diagnoses described in **Table 1** are available in **Supplementary Note and Tables**.

### DESCRIPTIVE ANALYSIS

In the Dutch population register, we selected siblings (sharing the same legal mother and father) born between 1965 and 1985, such that they are expected to have obtained their highest diploma before the first year of diagnostic data is available in 2011. We obtained a final sample of 1,743,032 siblings nested within 766,514 families (**Supplementary Note and Supplementary Figure 1**).

Inferring the number of years of education from the final degree obtained, Dutch siblings attend education for an average of 15.35 years (SD = 2.80, median = 17). The sibling sample appears slightly more educated than all individuals born between 1965-1985, see **Supplementary Note and Supplementary Table 2**.

We accessed psychiatric diagnoses based on the Diagnostic and Statistical Manual of Mental Disorders 4<sup>th</sup> Edition (DSM-IV) for all patients getting specialized mental care in the Netherlands between 2011 and 2016. Between these years, the yearly incidence of psychiatric diagnoses decreased (**Supplementary Tables 3-4**). This may reflect changes in access to specialized mental health care, e.g. a 2014-reform led to an increase in the care of chronic mental health disorders by general practitioners.

Individuals can be diagnosed with more than one disorder within a year, with one primary diagnosis and one or more secondary diagnoses (**Supplementary Table 7**), or across the 6 years we studied. Psychiatric diagnoses co-occur frequently (**Supplementary Table 6 and Supplementary Figure 2**) and are highly correlated (polychoric correlation up to 0.55 for MDD and PTSD). Schizophrenia is one exception as it is only weakly correlated with most other diagnoses (**Figure 1, Supplementary Table 6 & Supplementary Figure 2**). Genetic correlations across the GWASs selected for the MR analyses are also positive and generally substantial, but they do not always match phenotypic correlations in the Dutch population.

|                                                              |                                                          | Subsamples of individuals in CBS born between 1965 and 1985 |                 |              |                      |             |
|--------------------------------------------------------------|----------------------------------------------------------|-------------------------------------------------------------|-----------------|--------------|----------------------|-------------|
|                                                              |                                                          | All (1)                                                     | All with EA (2) | Siblings (3) | Siblings with EA (4) |             |
| Total sample size                                            |                                                          | 6,539,767                                                   | 3,305,733       | 3,234,923    | 1,743,032            |             |
| EA average (SD)                                              |                                                          | –                                                           | 14.7 (3.4)      | –            | 15.4 (2.8)           |             |
| Percentage of the population diagnosed between 2011 and 2016 | Individuals without any disorder                         | 93.00                                                       | 89.06           | 91.24        | 89.43                |             |
|                                                              | Individuals with at least one disorder                   | 7.00                                                        | 10.94           | 8.76         | 10.57                | <b>GWAS</b> |
|                                                              | Attention deficit hyperactivity disorder (ADHD)          | 0.93                                                        | 1.53            | 1.31         | 1.62                 | Demontis    |
|                                                              | Autism spectrum disorder (ASD)                           | –                                                           | –               | –            | –                    | Grove       |
|                                                              | Alcohol dependence                                       | 0.92                                                        | 1.41            | 1.12         | 1.30                 | Walters     |
|                                                              | Schizophrenia/schizophreniform/schizoaffective disorders | 0.39                                                        | 0.52            | 0.48         | 0.51                 | –           |
|                                                              | Schizophrenia                                            | 0.31                                                        | 0.42            | 0.38         | 0.41                 | Trubetskoy  |
|                                                              | Major depressive disorder (MDD)                          | 2.81                                                        | 4.42            | 3.34         | 4.08                 | Howard      |
|                                                              | Bipolar disorder                                         | 0.22                                                        | 0.33            | 0.29         | 0.34                 | Mullins     |
|                                                              | Bipolar I                                                | 0.15                                                        | 0.22            | 0.19         | 0.23                 | Mullins     |
|                                                              | Bipolar II                                               | 0.08                                                        | 0.13            | 0.11         | 0.14                 | Mullins     |
|                                                              | Anxiety disorders                                        | 2.50                                                        | 3.94            | 3.01         | 3.70                 |             |
|                                                              | Generalized anxiety (GAD)                                | 0.42                                                        | 0.67            | 0.56         | 0.70                 | Purves      |
|                                                              | Panic                                                    | 0.64                                                        | 1.00            | 0.81         | 0.97                 | –           |
|                                                              | Phobia                                                   | 0.69                                                        | 1.10            | 0.91         | 1.12                 | –           |
|                                                              | Obsessive-compulsive (OCD)                               | 0.28                                                        | 0.42            | 0.38         | 0.45                 | Arnold      |
|                                                              | Post-traumatic stress (PTSD)                             | 1.16                                                        | 1.84            | 1.21         | 1.51                 | Nievergelt  |
| Anorexia nervosa                                             | 0.03                                                     | 0.05                                                        | 0.05            | 0.06         | Watson               |             |
| Bulimia nervosa                                              | 0.05                                                     | 0.08                                                        | 0.06            | 0.08         | –                    |             |
| Personality disorders                                        | 3.00                                                     | 4.77                                                        | 3.91            | 4.81         | –                    |             |
| Cluster A                                                    | 0.09                                                     | 0.14                                                        | 0.11            | 0.14         | –                    |             |
| Cluster B                                                    | 0.95                                                     | 1.55                                                        | 1.19            | 1.47         | –                    |             |
| Cluster C                                                    | 2.04                                                     | 3.26                                                        | 2.75            | 3.38         | –                    |             |

TABLE 1. PREVALENCE OF DIAGNOSES IN THE DUTCH POPULATION REGISTRY (CBS) BETWEEN 2011 AND 2016 AND SOURCE OF GWAS FOR MATCHING DIAGNOSES.

The frequency of DSM-IV Diagnoses in the Dutch population registry registered in second-line/specialized mental health care, both as primary or secondary diagnoses. The definition of the disorder in the equivalent GWAS does not always perfectly align with the diagnosis in CBS, see **Supplementary Table 18** for details of GWASs used. Subsamples are relevant subsets of the Dutch population registry that met criteria for inclusion in the study. Inclusion is further described in the method section and the chart **Supplementary Figure 1**. EA: educational attainment. SD: Standard deviation.

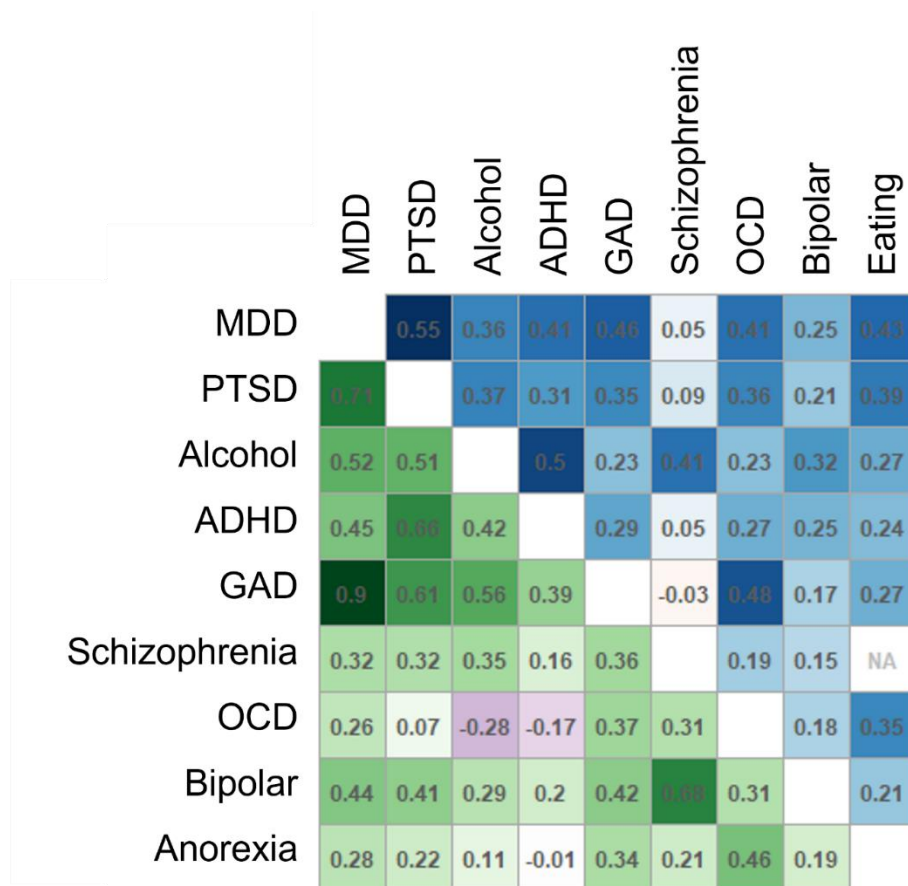

FIGURE 1. PHENOTYPIC AND GENETIC CORRELATIONS BETWEEN DIAGNOSES

**Upper diagonal:** polychoric correlations between diagnoses in the subset of 1.7 million siblings for whom education data was available in the Dutch population registry. NA: missing value due to low cell size. In this corner, anorexia nervosa was combined with bulimia nervosa into an eating disorder group due to the small number of individuals for either anorexia or bulimia diagnosis. **Lower diagonal:** genetic correlations between diagnoses estimated from summary statistics of the GWASs used in the MR analyses. Only disorders with data available in the Dutch population register and in GWASs are represented (see **Supplementary Tables 6 & 25** and **Supplementary Figure 2**)

**Figure 2** plots the prevalence (expressed in percentage) of each diagnosis given EA, split by sex (see also, **Supplementary Table 5 & Supplementary Figure 2**). Most diagnoses have a clear sex difference in prevalence, with higher prevalence for women, except for ADHD, Alcohol-related disorders, Schizophrenia. Most diagnoses show a decrease in prevalence with an increase in education, from 11 years to 22 years of education. The group with 11 years of education stands out in two ways. First, they started in a pre-university track (selective track) in secondary school but dropped out without obtaining a diploma or re-orienting. Second, this group has the highest prevalence for having any diagnosis, including a particularly high prevalence of bipolar disorder and schizophrenia diagnoses. 0.75% of individuals with 11

years of education are diagnosed with bipolar disorder (below 0.4% in all other EA groups), and ~4% of men with 11 years of education are diagnosed with schizophrenia (below 2% in further EA groups). Speculatively, dropping-out without resuming formal education could be related to prodromal symptoms for these disorders.

#### WITHIN-SIBSHIP ANALYSES

As expected, simple logistic regressions of EA on diagnoses revealed a negative association between EA and being diagnosed, for all disorders except GAD (OR = 0.99, SE = 0.004) (**Figure 3, Supplementary Tables 8-9**). We then ran the within-sibship regressions: we regress diagnosis status on the average EA for all siblings in a family and the deviation of the sibling's EA from the family average. With these more robust within-sibship regressions, most associations were weaker (OR closer to 1), but still significant. On the other hand, for GAD, schizophrenia, bipolar disorder and anorexia, the within-sibship association were stronger (OR further from 1), the relationship between EA and diagnosis is stronger within than between families. Overall, odd ratios ranged from 0.95 to 0.81 per year of education, indicating a modest relation between EA and risk of diagnoses (**Figure 3, Supplementary Figure 5, Supplementary Tables 10-11**).

We run several post-hoc robustness analyses of the within-sibship regression. As for most diagnoses the prevalence differs by sex, we replicate our analysis in subsets of sibships with same-sex siblings only. For almost all diagnoses, the direction and magnitude of effects are the same. Bulimia is a notable exception: within-male sibship analysis suggests a positive relation with EA (OR=1.25, SE=0.12), but this relation is not significant (P=0.02) (**Supplementary Figure 4 and Supplementary Tables 12-13**). We ran analyses excluding siblings with 11 years of education and with 2 years of education (which is an implausible outcome in the Dutch system). The results are qualitatively similar, but there are subtle changes in effect sizes when excluding siblings with only 2 years of education (**Supplementary Figure 5, Supplementary Tables 12 & 14**). Estimates of the relation between EA and schizophrenia diagnosis are the most sensitive to these exclusions.

We replicate this analysis using an alternative measure of mental care in the Dutch system: mental care expenditures, expressed in log(euro). Care expenditures include costs incurred within the specialized care, but also within the basic care (e.g. GP reporting mental health care as the reason for visit). Mental care expenditures are also negatively associated with EA



( $\beta=-0.11$ ,  $SE=0.00$ ). This association is reduced within-sibship ( $\beta=-0.08$ ,  $SE=0.00$ ). Comparing same-sex siblings only, the within-sibship estimate is stronger in men ( $-0.1$ ) than in women ( $-0.06$ ). These effects correspond to 10% and 6% decrease in expenditure per year of education within-sibship (**Supplementary Tables 16-17**).

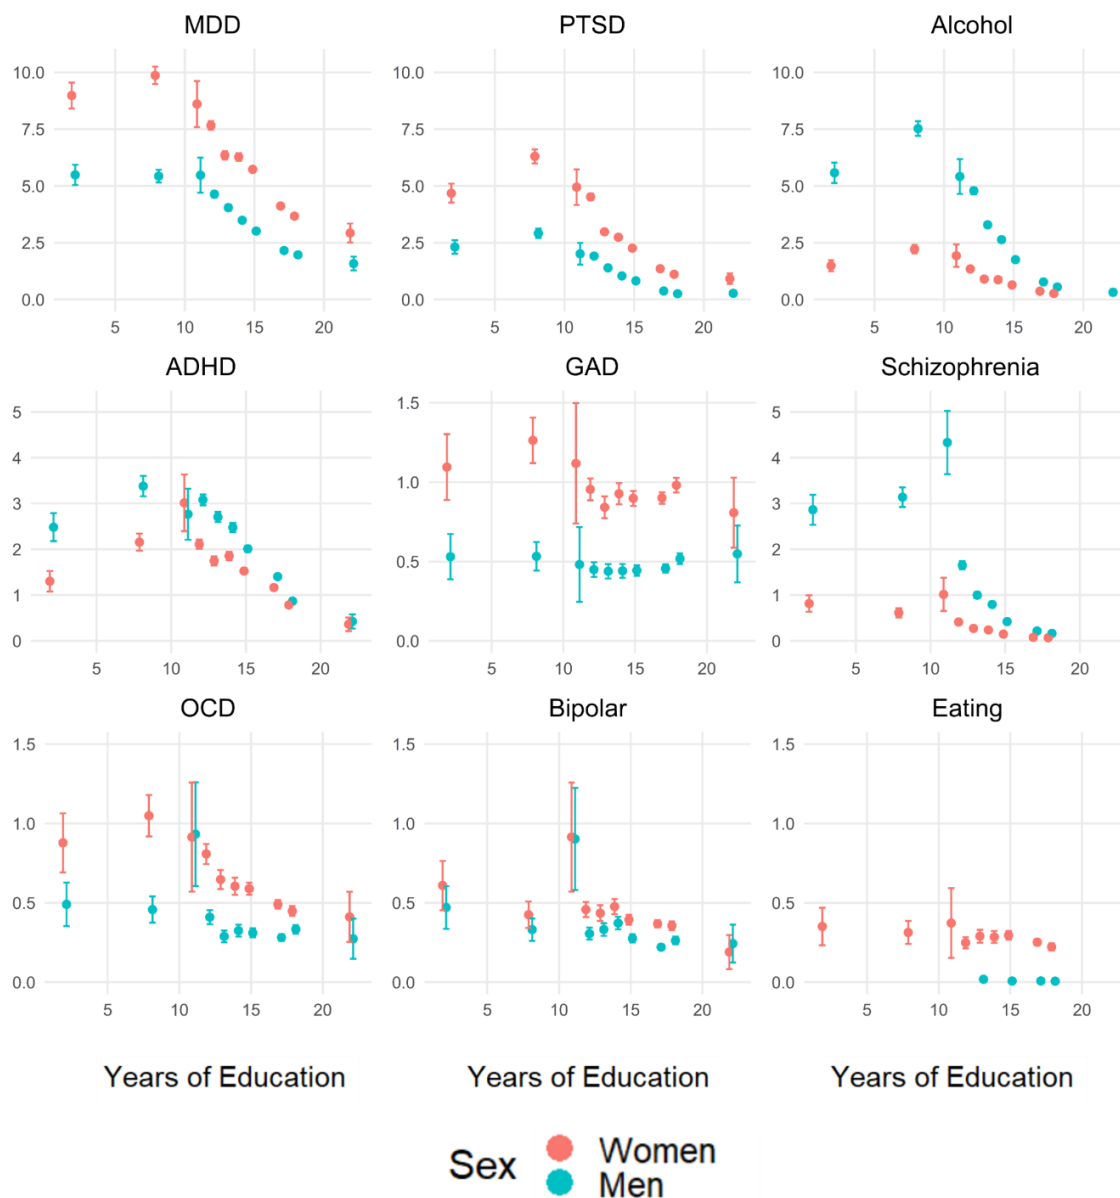

FIGURE 2. PREVALENCE OF DIAGNOSES GIVEN SOMEONE’S EDUCATIONAL ATTAINMENT AND SEX

Prevalence (expressed in percentage) of diagnoses in the sample of siblings for whom education data was available stratified by disorder (panels), education (x-axis) and sex (colour). Bars represent 95% confidence intervals. Note the scales of the y-axis are adapted depending on the diagnosis. In this figure, anorexia nervosa was combined with bulimia nervosa into an eating disorder group due to the low sample size of diagnosed individuals for some EA/sex strata. Only disorders with data available in the Dutch population register and in GWASs are represented (see **Supplementary Table 5** and **Supplementary Figure 3**).



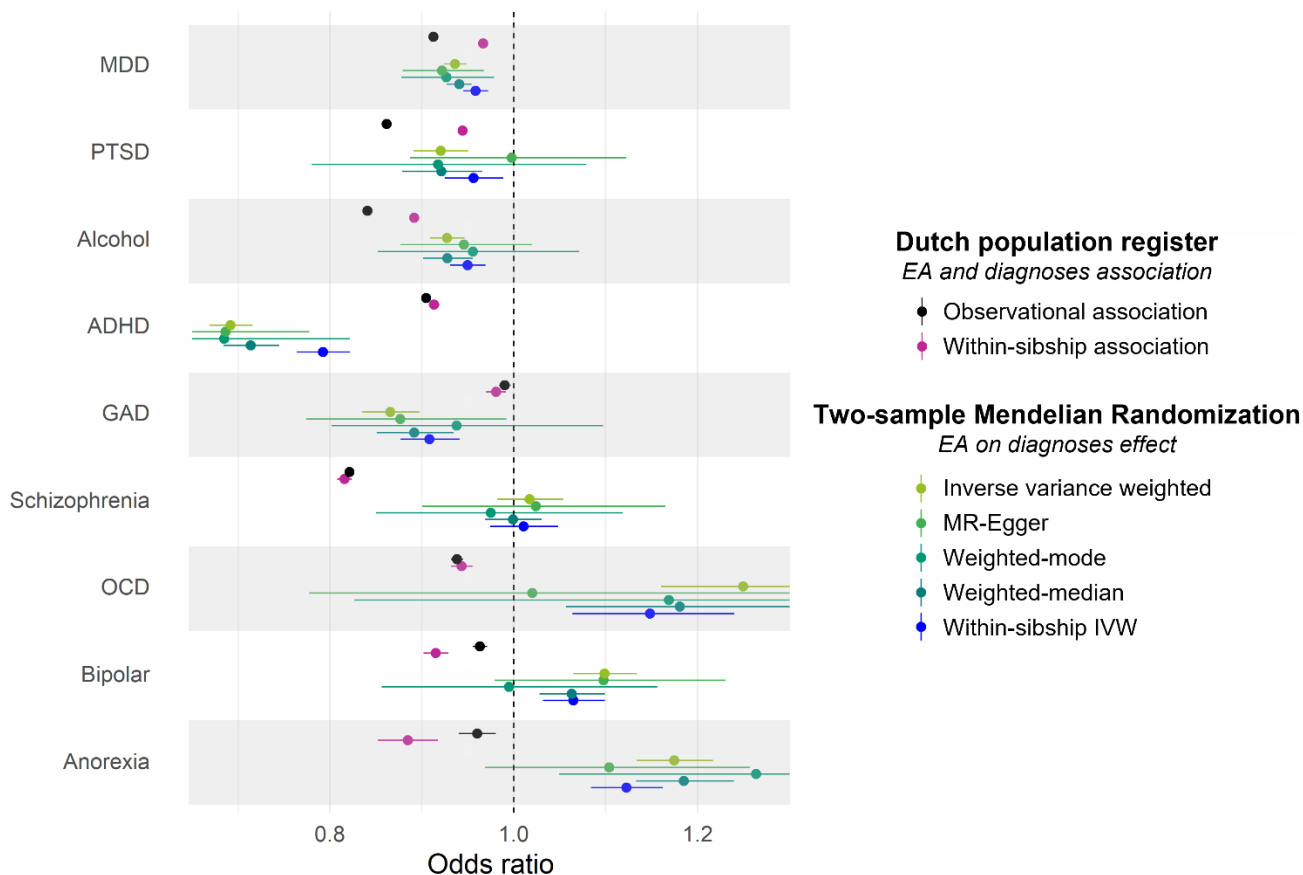

FIGURE 3. RELATION BETWEEN EA AND DIAGNOSES AS ESTIMATED WITH LOGISTIC REGRESSION, WITHIN-SIBSHIP REGRESSION OR MR.

Odds ratios per year of education as estimated with logistic regression (black) and within-sibship models (purple) in the Dutch population register and the two-sample MR analyses of EA on diagnoses (green/blue). Bars: 95% CIs. Only disorders for which both results are available are represented (see **Supplementary Tables** and **Supplementary Figures 4 & 7**)

## TWO-SAMPLE MENDELIAN RANDOMIZATION

### *MR estimates of EA on psychiatric diagnoses*

With EA as exposure and relatively strong instruments (mean F-statistics > 50), MR IVW estimates are not always consistent with within-sibship estimates (**Figure 3, Supplementary Tables 20-21, Supplementary Figure 3**). They suggest a comparable causal effect of EA on diagnosis for MDD, PTSD, and Alcohol dependence (IVW OR = 0.94, 0.92, and 0.93,  $P < 0.004$ ). For ADHD and GAD, the risk-decreasing effect of EA estimated in MR is stronger than estimated in the within-sibship design (IVW OR = 0.69 and 0.87,  $P < 0.004$ ). Importantly, MR estimates were yet not supportive of a protective effect of EA on four diagnoses. MR shows

no effect of EA on schizophrenia (IVW  $OR = 1.02$ ,  $P = 0.33$ ), and a risk-increasing effect of EA on diagnosis for bipolar disorder, anorexia, and OCD (respectively IVW  $OR = 1.10$ ,  $1.17$ , and  $1.25$ ,  $P < 0.004$ ), such that the liability to higher EA is causing a higher liability for these diagnoses. MR-Egger, weighted-mode and weighted-median estimates were mostly consistent in direction and effect sizes. Strick interpretation of evidence from pleiotropy-robust methods confirms a causal effect of EA on MDD and ADHD but not PTSD, GAD, or alcohol dependence.  $I^2$  were larger than 0.9 suggesting MR-Egger's estimates could be interpreted. There was evidence of heterogeneity for each EA-disorder pair indicating pleiotropy (Cochran's  $Q$  between 821 and 2101,  $P_s < 0.004$ ) but non-significant MR-Egger intercepts suggest the estimates are not biased by horizontal pleiotropy.

Exploratory sensitivity analyses based on SNP-effects on EA from a within-sibship GWAS yield lower estimates in the same direction for MDD, Alcohol dependence, ADHD and GAD (estimates became non-significant for PTSD and OCD) (**Supplementary Table 21**). The reduction in effect size is particularly large for ADHD (IVW  $OR = 0.69$ ; within-sibship EA IVW  $OR = 0.81$ ). However, the instrument was weak (mean F-statistics  $\sim 10.5$ ), which can bias MR results towards the null.

#### *MR estimates of psychiatric diagnoses on EA*

When considering the reverse effect of mental disorder liabilities on EA, we relaxed the p-value threshold for instrument inclusion to  $1e-5$  for GWASs with low number of genome-wide significant hits (GAD, OCD, PTSD, alcohol dependence). The mean F-statistics for the instruments were modest (34.8 to 44), and modest-to-weak (21.5 to 22.8) when the p-value threshold was relaxed.

IVW estimates suggest a negative causal effect of the liability to disorder on education attainment (hence a bidirectional negative effect) for ADHD (IVW  $\beta = -0.38$ ,  $P < 0.004$ ), and at  $p < 0.05$  (a liberal threshold given the number of MR tests) for MDD (IVW  $\beta = -0.32$ ,  $P = 0.010$ ), PTSD (IVW  $\beta = -0.06$ ,  $P = 0.026$ ), and GAD (IVW  $\beta = -0.09$ ,  $P = 0.016$ ) (**Figure 4, Supplementary Table 22-23**). We find no evidence of an effect of schizophrenia (IVW  $\beta = 0.00$ ,  $P = 0.94$ ), while higher liabilities for bipolar disorder and anorexia have a positive effect on EA (IVW  $\beta = 0.17$  and  $0.26$ ,  $P < 0.004$ ). The estimated effects of alcohol dependence (IVW  $\beta = -0.05$ ,  $P = 0.18$ ) and OCD liabilities (IVW  $\beta = -0.00$ ,  $P = 0.63$ ) on EA were not significant.

Again, MR-Egger, weighted-mode and weighted-median estimates were mostly consistent in direction and effect sizes. However, MR-Egger's estimates had low confidence and the weighted-mode estimate was  $<0$  (non-significant) for bipolar disorder. There was evidence of heterogeneity of effects for every disorder-EA pair (Cochran's  $Q$  between 26.3 to 2602.1,  $P$ s  $< 0.004$ ), but for OCD-EA (Cochran's  $Q = 29.6$ ,  $P = 0.04$ ). While the MR-Egger intercepts were never significant, the intercept for Anorexia-EA was the highest (0.06, SE = 0.01), which might indicate the presence of horizontal pleiotropy. All  $I^2$  were larger than 0.9, however the small number of instruments for most diagnoses (e.g. Anorexia N SNPs = 4) results in poor resolution to resolve directional pleiotropy. Exploratory analyses with SNP-effects based on within-sibship EA GWAS were consistent in direction and effect size with the previously described IVW estimates.

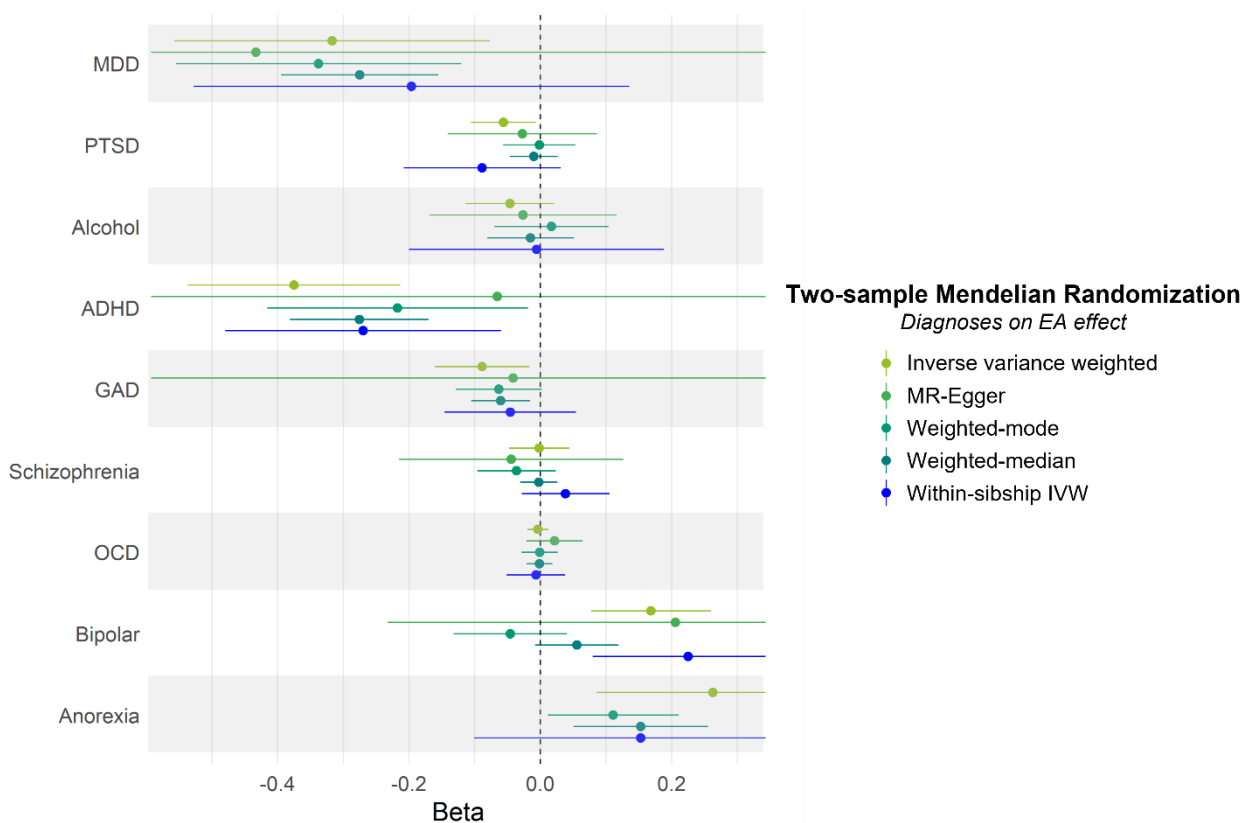

FIGURE 4. MR ANALYSES DIAGNOSIS AS EXPOSURE AND EDUCATIONAL ATTAINMENT AS THE OUTCOME.

Effect estimates of the two-sample MR analyses of EA on diagnoses. Bars: 95% CIs. Only disorders with data available in the Dutch population register and in GWASs are represented (see **Supplementary Tables 22 & 23** and **Supplementary Figure 4**).

## EDUCATION OF HEALTHY SIBLINGS IN THE DUTCH POPULATION REGISTRY

Motivated by the discordance between the within-sibship and MR analyses for bipolar disorder, anorexia, and OCD, the first implying a protective effect of education and the second a risk, we investigate the hypothesis that the (genetic) liability for being diagnosed with some disorders is in fact associated with higher education, while the disorder itself (or its prodromal manifestation) interferes with schooling. Under this model, bipolar, anorexic and OCD patients are expected to have a higher familial and genetic liability for EA than the general population. Therefore we expect the healthy siblings of these patients, but not of other patients, to be more highly educated than individuals in unaffected families. In the Dutch register, we do find that siblings of patients have less education than siblings in unaffected families for all disorders but bipolar disorder and anorexia (**Figure 5, Supplementary Table 24**). Unaffected siblings of patients with bipolar and anorexia have the same average years of education as unaffected families (average EA of unaffected families = 15.54; bipolar = 15.58, anorexia = 15.75, t-test  $P = 0.22$  for bipolar, 0.006 for anorexia). Siblings of Bipolar II patients had slightly higher EA than individuals in unaffected families (15.68,  $p < 0.004$ ) (**Supplementary Figure 6**).

## DISCUSSION

Triangulating across two designs, we find consistent protective effects where higher EA reduces the risk of MDD, alcohol dependence, GAD, ADHD, and PTSD diagnoses, though for some traits, there is also evidence for reverse causation. Critically, for MDD, alcohol dependence and PTSD, the implied causal effects in MR and within-sibship designs are substantially lower than the observational association. For other diagnoses, notably bipolar disorder, anorexia and OCD, the two designs yield inconsistent results. These are noteworthy and gave rise to additional analyses. Our study reveals that statistically convincing findings based on either design would have provided an incomplete or misleading understanding of the relationship between education and mental health.

First, we discuss the findings for some common diagnoses, highlighting representative results. Similar interpretation and integration of the broader literature could be done for the other diagnoses, but we defer to scientists with specific expertise on these disorders. We close with limitations and conclusions

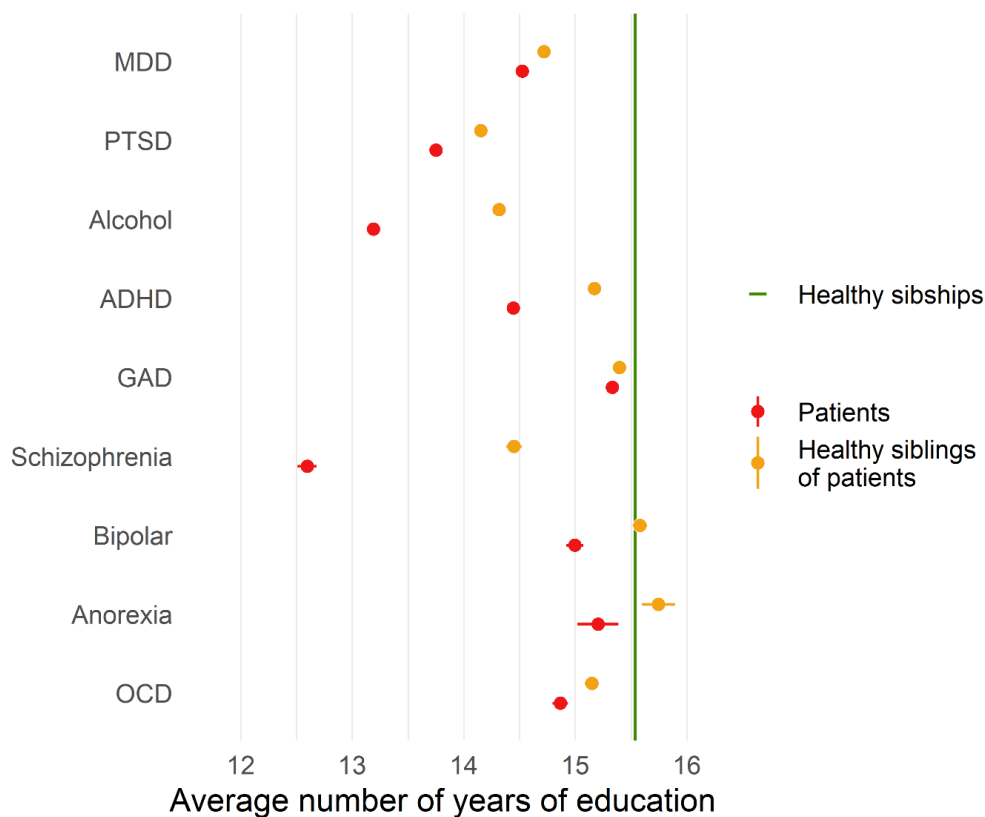

FIGURE 5. AVERAGE NUMBER OF YEARS OF EDUCATION OF PATIENTS, OF HEALTHY SIBLINGS OF PATIENTS AND UNAFFECTED SIBSHIPS.

The green line is the average number of years of education of unaffected sibships (15.54 years of education), in families in which none of the siblings was diagnosed with a mental disorder between 2011 and 2016. Red dots are the mean education of affected siblings per diagnosis. Orange dots are the mean education of siblings of an affected sibling that are themselves were never diagnosed in the 2011-2016 timeframe. Bars: 95% CIs. Only disorders with data available in the Dutch population register and in GWASs are represented (see **Supplementary Table 24** and **Supplementary Figure 8**).

### *Depression*

Both the within-sibship and the MR approach suggest around 6% lower odds of depression diagnosis per additional year of education, while there is also suggestive evidence for reverse causation (depression diagnosis or liability hampers EA). The implied causal effect of education on the risk of depression diagnosis is lower than the observational relationship. Our results are consistent with work that relies on other quasi-experimental methods, for example exploiting compulsory school-law reforms lengthening minimum EA<sup>32</sup>. One study found a  $\pm 7\%$  reduction in the probability of meeting diagnostic criteria for depression (N=3,704)<sup>33</sup>. Another study (N=21,085) found no significant effect of EA on depression, though

their negative sign is consistent with our findings<sup>34,35</sup>. Multiple previous (MR) studies based on UK Biobank data, which is an older (age 40-70) and more highly educated cohort, find no effect<sup>34,36</sup>. The inconsistency with the previous literature might be due to their samples of healthy volunteers, while our within-sibship sample is population-based. An additional year of education might especially benefit the mental health of those at the lower end of the education distribution (a group under-represented in volunteer samples)<sup>32</sup>. Also, the protective effect of EA on mental health might wane with age<sup>19</sup>.

We focussed on individual's final obtained degree. However, EA isn't the only aspect of education that relates to mental health. For example, a German reform reduced the academic high-school track by one year while keeping the curriculum constant. This intensified schooling increased depressive symptoms<sup>37</sup>. Others have also shown that kids being relatively young for their school grade are more likely to be diagnosed with depression<sup>38</sup>. While we find that higher EA plausibly reduces the risk of many diagnoses in adulthood, any reform aimed at increasing EA should keep in mind that other aspects of education might have opposite effects.

### *ADHD*

For ADHD reciprocal processes are plausible. The formal diagnosis of ADHD alludes to problems that interfere with school work. This creates an obvious dependence between ADHD and poor performance in school (socially or academically). Other two-sample MR studies also reported the bidirectional effect of EA and ADHD. Additionally, they suggest this effect is independent of IQ<sup>27,39</sup>. Interestingly, our MR estimate of the effect of EA on ADHD is lower when using SNP-effects based on within-sibship EA GWAS, suggesting that assortative mating, population stratification, and/or gene-environment correlation might bias MR estimates. These biases could explain the difference in estimates between MR and the within-sibship analysis. On the other hand, the difference between the observational and within-sibship association registry is small, suggesting familial factors do not explain the association between EA and ADHD diagnosis.

ADHD is part of the "disorders usually first diagnosed in infancy" in the DSM-IV, hence usually diagnosed at school age, which seem inconsistent with a causal effect of EA on ADHD diagnoses. Our data concerns ADHD diagnoses in adulthood. As we do not have data on age at first diagnosis, we cannot distinguish between a recurring diagnosis and first diagnosis.

However, there are plausible mechanisms through which EA might continue to affect the likelihood of diagnosis after one's educational trajectory. For example, higher-educated individuals might better cope with their symptoms and might have more power to select suitable environments (e.g., selection of jobs with more flexibility<sup>40</sup>).

### *Schizophrenia*

The within-sibship design estimates 18% lower odd of schizophrenia per additional year of education, while MR suggests no causal relationship. The within-sibship association might reflect the interfering effect of prodromal or early symptoms of schizophrenia on education. This would be consistent with our observation that 4% of Dutch men who drop out of the pre-university high school track, and do not re-enter education, are diagnosed with schizophrenia. However, we do not observe a causal effect of schizophrenia on EA in our MR analysis. Note that the interpretation of MR is difficult when the exposure is binary and rare. The MR estimates should be viewed as reflecting the effect of the liability for being diagnosed, not an effect of the diagnosis itself. It is easy to imagine how core symptoms of schizophrenia, like delusions, hallucinations, and disorganized thoughts, interfere with education, but these symptoms are not gradually experienced over the entire liability spectrum. If we do accept the MR findings, the discrepancy between the within-sibship and the MR results could be alternatively explained by factors not shared between siblings that reduce EA and increase the risk of schizophrenia diagnosis (e.g. risk exposures such as trauma). Contrasting our findings, previous MR estimates using earlier schizophrenia GWASs hint at an increased risk for schizophrenia per additional year of education<sup>26,28</sup>, as we found for anorexia, OCD, and bipolar disorder.

### *Bipolar disorder*

Bipolar disorder, anorexia nervosa, and OCD have the most striking pattern of results. While the within-sibship design suggests that each additional year of education *reduces* the likelihood of being diagnosed by 6 to 12%, the MR estimates suggest that EA *increases* the likelihood. We hypothesised that these diagnoses follow a model where the (genetic) liability for being diagnosed is associated with higher education, while the disorder itself (or its prodromal manifestation) interferes with schooling. Supporting this, we found (1) a high prevalence of bipolar disorder among pupils dropping out of the pre-university high-school



track and (2) healthy siblings of bipolar and anorexic patients have similar or even higher EA than the average unaffected sibships. Other Dutch studies comparing siblings of patients confirm this observation for bipolar disorder compared to schizophrenia or MDD<sup>41,42</sup>. However, this was not replicated in Denmark<sup>43</sup>. Bipolar disorder is associated with traits that are valuable in school settings like more creativity<sup>44,45</sup> and higher childhood IQ<sup>46</sup>. A Swedish population-cohort study reports that individuals with excellent high-school performance have a fourfold increased risk of bipolar disorder over those with average grades<sup>47</sup>. A true positive relation between factors that increase both success in education and risk of bipolar diagnosis seems supported, although the mechanism remains unclear. They could share biological mechanisms or psychological traits like creativity. Likewise, higher-educated individuals, or individuals coming from higher-educated families, could be more likely to be diagnosed with these disorders, due to more proactive help seeking, better access to care that facilitates these diagnoses, or preferential diagnosis by practitioners. Finally, biased selection into GWASs could result in the selection of bipolar disorder or anorexia cases with higher-than-average education. Further studies are essential to understanding the mechanisms of the apparently contradictory association between these disorders and EA.

### *Limitations*

Our conclusions rely on within-sibship and MR estimates, and on whether we can interpret contradictory findings. We assume these contradictions are mainly due to true differences in underlying phenomena. However, other statistical, measurement-, and sampling-related factors could play a role.

The two methods rely on data obtained in different samples drawn from different populations. Our within-sibship analysis was based on registry data, containing most of the Dutch population born between 1985-1965, so highly representative for the Netherlands. In contrast, the MR is based on GWASs of international samples who are volunteers of European-ancestry. Both higher risk for mental illness and lower EA are known to increase non-participation and participant attrition<sup>48-51</sup>, a selection bias that could induce a collider bias<sup>52</sup>. In the within-sibship analysis, we rely on diagnoses by professionals in specialized care, therefore dependent on the current referral policies of the Dutch healthcare system. All our GWASs rely on diagnoses, but they differ on the report (self-report, medical files, etc.) and on the timeframe (most look at lifetime diagnoses, but the age range of participants vary widely).

In both types of data, who seeks help and who is diagnosed may depend on class, ethnicity and context. Our conclusions are phrased in terms of diagnoses; potential mechanisms discussed are speculative. Any conclusions beyond diagnoses run into the imperfect relation between people's symptoms and people's DSM-IV diagnosis.

Regarding two-sample MR, we use MR analyses robust to weak-instrument and pleiotropy, but the additional statistical power required make the estimates more uncertain. To control for potential biases due to demographic and dynastic effects, we used summary statistics from a within-sibship GWAS. However, EA is the only trait with a within-sibship GWAS suitable for MR, leading to an unbalanced control of these biases in our MR. Notably, dynastic effects could lead to false positive bidirectional effects<sup>53</sup>. Similar well-understood caveats apply to sibling designs but most additional criticisms of this design<sup>8,9</sup> pertain to lack of insight on the direction of effect and the possible underestimation of effect sizes.

Finally, our findings pertain to the effects of education on mental health within the current confines of social life and social policy. Our findings do not identify an immutable or permanent cause of differences in mental health. Policy changes outside education (e.g. minimum wage, affordable living, quality housing) may improve people's mental health and could as effectively close the health gap between educational groups.

### *Conclusion*

The aforementioned caveats limit the certainty we should ascribe to specific causal claims. Nevertheless, we established consistent potential causal effects of EA on the risk of being diagnosed with MDD, ADHD, PTSD, alcohol dependence, and GAD. These potentially causal effects are smaller than the observational associations (but for GAD). For diagnoses like bipolar disorder and anorexia, our results suggest a positive relationship between EA and the diagnosis liability, yet a negative relationship between EA and the diagnosis itself. These patterns deserve further study and would have been missed when applying a causal-inference technique in isolation.

## METHODS

This study was pre-registered: <https://osf.io/vmpfg/>. Deviations to the preregistration are detailed in **Supplementary Note**. All code associated with the analyses is available on GitHub

at <https://github.com/PerlineDemange/CBS-MR>. We follow the STROBE<sup>54</sup> and STROBE-MR<sup>55</sup> reporting guidelines (**Supplementary Tables 26 & 27**). This research was reviewed and approved by the Scientific and Ethical Review Board (VCWE) of the Faculty of Behaviour & Movement Sciences, VU University Amsterdam; application number VCWE-2020-054.

## WITHIN-SIBSHIP DESIGN

### DATA SOURCE

We analyze restricted access microdata from Statistics Netherlands (CBS). Under strict conditions, these microdata are accessible for statistical and scientific research. For further information on remote access procedures: [microdata@cbs.nl](mailto:microdata@cbs.nl).

### STUDY POPULATION

We included individuals born between 1965 and 1985 ( $N = 6,539,767$ ), such that they are between 26 and 46 years old when the first year of diagnostic data is available. From these we select siblings (sharing the same legal mother and father), where more than one sibling has educational data available. We retain a final sample of  $N = 1,743,032$  individuals nested within 766,514 families. For a comprehensive overview of the selection procedure, see **Supplementary Note** and **Supplementary Figure 1**.

### EDUCATIONAL ATTAINMENT

Educational attainment data is based on various registers and surveys and has a high coverage (more than 11 million people). Based on the final degree obtained we inferred the number of years of full-time education of the individual. The transformation of the 17 diploma categories to years of education is available in **Supplementary Table 1**. For a comprehensive overview of the variable definition, see **Supplementary Note**.

### MENTAL HEALTH OUTCOMES

The **Dutch mental health care system** distinguishes two systems of care. Here we rely on diagnostic data for specialized/second-line care. Specialized mental care is intended for patients with severe or complex diagnoses which require the attention of a psychiatrist or clinical psychologist. **Psychiatric diagnoses** are obtained from the care trajectory of patients getting specialized mental care. Diagnoses are classified based on the Diagnostic and Statistical Manual of Mental Disorders 4<sup>th</sup> edition (DSM IV). We consider an individual as

affected if they were diagnosed with any of the disorders listed in **Table 1**, in at least one year during the 2011 to 2016 period.

Mental health care expenditures<sup>56</sup> are assessed in two ways: expenditures from the first line/basic care and expenditures from the 2<sup>nd</sup> line/specialized care. We summed basic and specialized care for each year. Due to the steeply skewed distribution of incurred mental health expenditures (Supplementary Table 16, Supplementary Figure 6), we averaged the expenditures across 2009–2018 for each individual and log-transformed the personal average.

#### STATISTICAL ANALYSES

All diagnoses analyses were done in the sibling sample (4), for each mental health diagnosis separately. We estimate polychoric correlations between all diagnoses. We ran an observational analysis: a logistic regression with EA as a predictor and the psychiatric diagnosis as outcome, ignoring family structure. We then ran within-sibship logistic regression analysis. We regress diagnosis status on the average EA for all siblings in a family and the individual deviation of the sibling's EA from their family average. The effect of the average EA (between-sibship effect) represents the expected change in the outcome being diagnosed given a one-unit (the unit being scaled as a year of education) change in the sibling average, while the effect of the deviation of the sibling to their family average (within-sibship effect) represents the effect of EA when keeping the factors common to the family constant. We do not correct for family clustering in these analyses. Part of the reason is the computational limitation of logistic regressions with random family effects in large sample sizes and low prevalence. If the dependence between errors for relatives is very strong we approach an upper bound where the number of families, rather than individuals, equals the number of independent observations. As most families in our data consist of 2 siblings, we can estimate the upper bound for the SEs to be  $\sqrt{2}$ \*uncorrected SEs. As our uncorrected SEs are very small, this correction would not change our results. Additionally, we focus on interpreting the effect sizes, p-value being of little interest at this sample size. For the analysis of mental health care expenditures, we fit a linear model instead of a logistic model as the outcome is continuous, and also report results from linear models with random family effects. In all analyses, we included sex, birth year and birth order as covariates.

As sensitivity analyses, we separately considered men and women (from same-sex sibships) and we omitted specific education groups that are rare or implausible given the Dutch

educational system (11 and 2 years of education). We investigated mean differences in EA between patients, siblings of patients, and families that are entirely unaffected. We performed t-test to compare the mean EA of these groups for each disorder.

## TWO-SAMPLE MENDELIAN RANDOMIZATION

We follow recommendations by Burgess et al<sup>57</sup>.

## SUMMARY STATISTICS

We relied on summarized statistics from a large well powered 2018 GWAS of EA<sup>13</sup> (EA3). We reproduced this GWAS by meta-analyzing published summary statistics with summary statistics obtained from 23anMe, Inc, as done in <sup>58</sup>. For additional sensitivity analyses, we relied on summary data from the within-sibship GWAS of EA<sup>17</sup>. The within-sibship GWAS is significantly smaller, but because the SNP-effects are estimated within-family they are unbiased by potential effects of assortative mating, population stratification or intergenerational genetic effects<sup>59,60</sup>.

For each psychiatric disorder, we selected GWAS summary statistics preferentially selecting the most recent or largest GWAS available. A full list of GWASs and a description of the summary statistics are available in **Supplementary Table 18**. We assessed potential sample overlap between EA and psychiatric disorders GWASs using LD-score cross-trait intercept as proxy<sup>61</sup> (**Supplementary Table 19 & Supplementary Note**).

## CHOICE OF THE GENETIC VARIANTS

For data cleaning and analyses we used TwoSampleMR<sup>62</sup> in R.4.1.0<sup>63</sup>. When analysing EA as the exposure, we first excluded genetic variants not present in the outcome summary data. For EA3 summary statistics, we selected genetic variants associated with EA at  $p < 5e-8$ . For within-sibship EA summary statistics, we selected significant independent loci identified by the EA3 GWAS, which were also associated at  $p$ -value  $< 0.05$  in the within-sibship EA GWAS. We then clumped to select statistically independent variants ( $kb=1000$ ,  $r^2 = 0.001$ ). When analysing psychiatric disorders as the exposure, if clumping genetic variants associated at  $p < 5e-8$  led to the selection of less than 5 genetics variants, we further selected genetic variants associated with the exposure at  $p < 1e-5$  (this occurred for autism, GAD, bipolar-II disorder, OCD, PTSD, and alcohol dependence). Variants were then harmonized between exposure and outcome summary statistics, ensuring the SNP effect relates to the same reference allele. Ambiguous and palindromic variants with  $MAF > 0.42$  were excluded.

We scaled the effect sizes from the two EA GWASs so that the SNP-effects reflect change in term of years of education. For this, we estimated the weighted average standard deviation of the education phenotype in the cohorts included in the EA3 study (SD = 3.9 years) and multiplied both SNP-effects and their SEs by this number<sup>27,64</sup>. Estimates for the psychiatric disorders SNPs were converted to log(OR) if reported in OR. MR estimates were transformed back to the OR scale where needed.

## ANALYSES

We ran two sets of MR analyses: EA as exposure and mental disorder as an outcome, and mental disorder as exposure and EA as an outcome. We ran an inverse-variant weighted (IVW) mendelian randomization<sup>12</sup>. We judged the significance of the p-value following a Bonferroni correction: significance threshold  $0.05/12$  traits = 0.004. To test for the robustness of the IVW findings against potential violation of the MR assumptions, we ran MR-Egger<sup>14</sup>, weighted-mode<sup>16</sup>, and weighted-median<sup>15</sup> analysis. We reported the Cochran Q's-statistic SNP effect heterogeneity and the F-statistics assessing potential weak instruments bias<sup>65,66</sup>. Additionally, we reported the  $I_2$  statistic<sup>67</sup>, which gives an indication of the violation of the NO Measurement Error (NOME) assumption, on which MR-Egger relies. We also report LD-score based genetic correlations between all GWASs, computed with genomic SEM.

## CODE AND DATA AVAILABILITY

All code associated with the analyses is available on GitHub at <https://github.com/PerlineDemange/CBS-MR>.

We analyze restricted access microdata from Statistics Netherlands (CBS). Under strict conditions, these microdata are accessible for statistical and scientific research. For further information on remote access procedures: [microdata@cbs.nl](mailto:microdata@cbs.nl). For GWAS summary statistics availability, see original publications. For 23andMe, Inc. dataset access, see <https://research.23andme.com/dataset-access>.

## CONTRIBUTIONS

P.A.D. and M.G.N. conceived and designed the study, with helpful suggestions from E.v.B. and D.I.B. P.A.D. analysed the data, with support from M.G.N. for the MR analyses. P.A.D.

designed the figures and drafted the manuscript. All authors contributed to and approved the final version of the manuscript.

## ACKNOWLEDGMENTS

We thank the Open Data Infrastructure for Social Science and Economic Innovation (ODISSEI: <https://ror.org/03m8v6t10>) for financing access to Statistics Netherlands microdata via a microdata access grant awarded to P.A.D. and a member discount. P.A.D. is supported by the grant 531003014 from The Netherlands Organisation for Health Research and Development (ZonMW). D.I.B. is supported by the Royal Netherlands Academy of Science (KNAW) Professor Award (PAH/6635). E.v.B. is supported by ZonMW grant 531003014 and VENI grant 451-15-017. M.G.N. is supported by R01MH120219, ZonMW grants 849200011 and 531003014 from The Netherlands Organisation for Health Research and Development, a VENI grant awarded by NWO (VI.Veni.191 G.030) and is a Jacobs Foundation Research Fellow. We thank the research participants and employees of 23andMe, Inc. for making this work possible.

## REFERENCES

1. OECD. *Health at a Glance: Europe 2018: State of Health in the EU Cycle*. Organisation for Economic Co-operation and Development; 2018. Accessed July 25, 2022. [https://www.oecd-ilibrary.org/social-issues-migration-health/health-at-a-glance-europe-2018\\_health\\_glance\\_eur-2018-en](https://www.oecd-ilibrary.org/social-issues-migration-health/health-at-a-glance-europe-2018_health_glance_eur-2018-en)
2. World Health Organization. *World Health Statistics 2022: Monitoring Health for the SDGs, Sustainable Development Goals*. World Health Organization; 2022. Accessed July 25, 2022. <https://apps.who.int/iris/handle/10665/356584>
3. Crossley NA, Allende LM, Czepielewski LS, et al. The enduring gap in educational attainment in schizophrenia according to the past 50 years of published research: a systematic review and meta-analysis. *Lancet Psychiatry*. 2022;9(7):565-573. doi:10.1016/S2215-0366(22)00121-3
4. Glahn DC, Bearden CE, Bowden CL, Soares JC. Reduced educational attainment in bipolar disorder. *J Affect Disord*. 2006;92(2):309-312. doi:10.1016/j.jad.2006.01.025
5. Lorant V, Deliège D, Eaton W, Robert A, Philippot P, Ansseau M. Socioeconomic Inequalities in Depression: A Meta-Analysis. *Am J Epidemiol*. 2003;157(2):98-112. doi:10.1093/aje/kwf182
6. Nordmo M, Kinge JM, Reme BA, et al. The educational burden of disease: a cohort study. *Lancet Public Health*. 2022;7(6):e549-e556. doi:10.1016/S2468-2667(22)00059-7



7. Carlin JB, Gurrin LC, Sterne JA, Morley R, Dwyer T. Regression models for twin studies: a critical review. *Int J Epidemiol*. 2005;34(5):1089-1099. doi:10.1093/ije/dyi153
8. Sjölander A, Zetterqvist J. Confounders, Mediators, or Colliders: What Types of Shared Covariates Does a Sibling Comparison Design Control For? *Epidemiology*. 2017;28(4):540-547. doi:10.1097/EDE.0000000000000649
9. Frisell T, Öberg S, Kuja-Halkola R, Sjölander A. Sibling Comparison Designs: Bias From Non-Shared Confounders and Measurement Error. *Epidemiology*. 2012;23(5):713-720. doi:10.1097/EDE.0b013e31825fa230
10. Sanderson E, Glymour MM, Holmes MV, et al. Mendelian randomization. *Nat Rev Methods Primer*. 2022;2(1):6. doi:10.1038/s43586-021-00092-5
11. Munafò M, Davies NM, Davey Smith G. Can genetics reveal the causes and consequences of educational attainment? *J R Stat Soc Ser A Stat Soc*. 2020;183(2):681-688. doi:10.1111/rssa.12543
12. Burgess S, Butterworth A, Thompson SG. Mendelian Randomization Analysis With Multiple Genetic Variants Using Summarized Data. *Genet Epidemiol*. 2013;37(7):658-665. doi:10.1002/gepi.21758
13. Lee JJ, Wedow R, Okbay A, et al. Gene discovery and polygenic prediction from a genome-wide association study of educational attainment in 1.1 million individuals. *Nat Genet*. 2018;50(8):1112-1121. doi:10.1038/s41588-018-0147-3
14. Bowden J, Smith GD, Burgess S. Mendelian randomization with invalid instruments: Effect estimation and bias detection through Egger regression. *Int J Epidemiol*. 2015;44(2):512-525. doi:10.1093/ije/dyv080
15. Bowden J, Davey Smith G, Haycock PC, Burgess S. Consistent Estimation in Mendelian Randomization with Some Invalid Instruments Using a Weighted Median Estimator. *Genet Epidemiol*. 2016;40(4):304-314. doi:10.1002/gepi.21965
16. Hartwig FP, Smith GD, Bowden J. Robust inference in summary data Mendelian randomization via the zero modal pleiotropy assumption. *Int J Epidemiol*. 2017;46(6):1985-1998. doi:10.1093/ije/dyx102
17. Howe LJ, Nivard MG, Morris TT, et al. Within-sibship genome-wide association analyses decrease bias in estimates of direct genetic effects. *Nat Genet*. 2022;54(5):581-592. doi:10.1038/s41588-022-01062-7
18. Howe LJ, Tudball M, Davey Smith G, Davies NM. Interpreting Mendelian-randomization estimates of the effects of categorical exposures such as disease status and educational attainment. *Int J Epidemiol*. Published online September 27, 2021:dyab208. doi:10.1093/ije/dyab208

19. McFarland MJ, Wagner BG. Does a college education reduce depressive symptoms in American young adults? *Soc Sci Med.* 2015;146:75-84. doi:10.1016/j.socscimed.2015.09.029
20. Fujiwara T, Kawachi I. Is education causally related to better health? A twin fixed-effect study in the USA. *Int J Epidemiol.* 2009;38(5):1310-1322. doi:10.1093/ije/dyp226
21. Halpern-Manners A, Schnabel L, Hernandez EM, Silberg JL, Eaves LJ. The Relationship between Education and Mental Health: New Evidence from a Discordant Twin Study. *Soc Forces.* 2016;95(1):107-131. doi:10.1093/sf/sow035
22. Davies NM, Hill WD, Anderson EL, Sanderson E, Deary IJ, Davey Smith G. Multivariable two-sample Mendelian randomization estimates of the effects of intelligence and education on health. Teare MD, Franco E, Burgess S, eds. *eLife.* 2019;8:e43990. doi:10.7554/eLife.43990
23. Viinikainen J, Bryson A, Böckerman P, et al. Does education protect against depression? Evidence from the Young Finns Study using Mendelian randomization. *Prev Med.* 2018;115:134-139. doi:10.1016/j.ypmed.2018.08.026
24. Wray NR, Ripke S, Mattheisen M, et al. Genome-wide association analyses identify 44 risk variants and refine the genetic architecture of major depression. *Nat Genet.* 2018;50(5):668-681. doi:10.1038/s41588-018-0090-3
25. Harrison S, Davies AR, Dickson M, et al. The causal effects of health conditions and risk factors on social and socioeconomic outcomes: Mendelian randomization in UK Biobank. *Int J Epidemiol.* 2020;49(5):1661-1681. doi:10.1093/ije/dyaa114
26. Adams CD. A multivariable Mendelian randomization to appraise the pleiotropy between intelligence, education, and bipolar disorder in relation to schizophrenia. *Sci Rep.* 2020;10(1):6018. doi:10.1038/s41598-020-63104-6
27. Dardani C, Riglin L, Leppert B, et al. Is genetic liability to ADHD and ASD causally linked to educational attainment? *Int J Epidemiol.* 2021;50(6):2011-2023. doi:10.1093/ije/dyab107
28. Yuan S, Xiong Y, Michaëlsson M, Michaëlsson K, Larsson SC. Genetically predicted education attainment in relation to somatic and mental health. *Sci Rep.* 2021;11(1):4296. doi:10.1038/s41598-021-83801-0
29. Pérez-Vigil A, Fernández de la Cruz L, Brander G, et al. Association of Obsessive-Compulsive Disorder With Objective Indicators of Educational Attainment. *JAMA Psychiatry.* 2018;75(1):47-55. doi:10.1001/jamapsychiatry.2017.3523
30. Vilaplana-Pérez A, Sidorchuk A, Pérez-Vigil A, et al. Assessment of Posttraumatic Stress Disorder and Educational Achievement in Sweden. *JAMA Netw Open.* 2020;3(12):e2028477. doi:10.1001/jamanetworkopen.2020.28477
31. Lawlor DA, Tilling K, Davey Smith G. Triangulation in aetiological epidemiology. *Int J Epidemiol.* 2016;45(6):1866-1886. doi:10.1093/ije/dyw314

32. Graeber D. Does more education protect against mental health problems? *Dtsch Inst Für Wirtsch DIW Berl.* 2017;DIW Roundup: Politik im Fokus(113).
33. Crespo L, López-Noval B, Mira P. Compulsory schooling, education, depression and memory: New evidence from SHARELIFE. *Econ Educ Rev.* 2014;43:36-46. doi:10.1016/j.econedurev.2014.09.003
34. Davies NM, Dickson M, Davey Smith G, Windmeijer F, van den Berg GJ. The Causal Effects of Education on Adult Health, Mortality and Income: Evidence from Mendelian Randomization and the Raising of the School Leaving Age. Published online May 21, 2019. doi:10.2139/ssrn.3390179
35. Davies NM, Dickson M, Davey Smith G, van den Berg GJ, Windmeijer F. The causal effects of education on health outcomes in the UK Biobank. *Nat Hum Behav.* 2018;2(2):117-125. doi:10.1038/s41562-017-0279-y
36. Weijer MV de, Demange P, Pelt D, Bartels M, Nivard MG. Disentangling potential causal effects of educational duration on well-being, and mental and physical health outcomes. Published online September 27, 2022. doi:10.31234/osf.io/4uqyg
37. Hofmann S, Mühlenweg A. Learning intensity effects in students' mental and physical health – Evidence from a large scale natural experiment in Germany. *Econ Educ Rev.* 2018;67:216-234. doi:10.1016/j.econedurev.2018.10.001
38. Root A, Brown JP, Forbes HJ, et al. Association of Relative Age in the School Year With Diagnosis of Intellectual Disability, Attention-Deficit/Hyperactivity Disorder, and Depression. *JAMA Pediatr.* 2019;173(11):1068-1075. doi:10.1001/jamapediatrics.2019.3194
39. Michaëlsson M, Yuan S, Melhus H, et al. The impact and causal directions for the associations between diagnosis of ADHD, socioeconomic status, and intelligence by use of a bi-directional two-sample Mendelian randomization design. *BMC Med.* 2022;20(1):106. doi:10.1186/s12916-022-02314-3
40. Kossek EE, Lautsch BA. Work–Life Flexibility for Whom? Occupational Status and Work–Life Inequality in Upper, Middle, and Lower Level Jobs. *Acad Manag Ann.* Published online May 19, 2017. doi:10.5465/annals.2016.0059
41. Tempelaar WM, Termorshuizen F, MacCabe JH, Boks MPM, Kahn RS. Educational achievement in psychiatric patients and their siblings: a register-based study in 30 000 individuals in The Netherlands. *Psychol Med.* 2017;47(4):776-784. doi:10.1017/S0033291716002877
42. Vreeker A, Boks MPM, Abramovic L, et al. High educational performance is a distinctive feature of bipolar disorder: a study on cognition in bipolar disorder, schizophrenia patients, relatives and controls. *Psychol Med.* 2016;46(4):807-818. doi:10.1017/S0033291715002299

43. Sletved KSO, Ziersen SC, Andersen PK, Vinberg M, Kessing LV. Socio-economic functioning in patients with bipolar disorder and their unaffected siblings – results from a nation-wide population-based longitudinal study. *Psychol Med*. Published online May 26, 2021:1-8. doi:10.1017/S0033291721002026
44. MacCabe JH, Sariaslan A, Almqvist C, Lichtenstein P, Larsson H, Kyaga S. Artistic creativity and risk for schizophrenia, bipolar disorder and unipolar depression: A Swedish population-based case-control study and sib-pair analysis. *Br J Psychiatry*. 2018;212(6):370-376. doi:10.1192/bjp.2018.23
45. Power RA, Steinberg S, Bjornsdottir G, et al. Polygenic risk scores for schizophrenia and bipolar disorder predict creativity. *Nat Neurosci*. 2015;18(7):953-955. doi:10.1038/nn.4040
46. Smith DJ, Anderson J, Zammit S, Meyer TD, Pell JP, Mackay D. Childhood IQ and risk of bipolar disorder in adulthood: prospective birth cohort study. *BJPsych Open*. 2015;1(1):74-80. doi:10.1192/bjpo.bp.115.000455
47. MacCabe JH, Lambe MP, Cnattingius S, et al. Excellent school performance at age 16 and risk of adult bipolar disorder: national cohort study. *Br J Psychiatry J Ment Sci*. 2010;196(2):109-115. doi:10.1192/bjp.bp.108.060368
48. Mills MC, Rahal C. A scientometric review of genome-wide association studies. *Commun Biol*. 2019;2(1):1-11. doi:10.1038/s42003-018-0261-x
49. Alten S van, Domingue BW, Faul J, Galama T, Marees AT. Correcting for volunteer bias in GWAS uncovers novel genetic variants and increases heritability estimates. Published online November 10, 2022:2022.11.10.22282137. doi:10.1101/2022.11.10.22282137
50. Alten S van, Domingue BW, Galama T, Marees AT. Reweighting the UK Biobank to reflect its underlying sampling population substantially reduces pervasive selection bias due to volunteering. Published online May 16, 2022:2022.05.16.22275048. doi:10.1101/2022.05.16.22275048
51. Fry A, Littlejohns TJ, Sudlow C, et al. Comparison of Sociodemographic and Health-Related Characteristics of UK Biobank Participants With Those of the General Population. *Am J Epidemiol*. 2017;186(9):1026-1034. doi:10.1093/aje/kwx246
52. Munafò MR, Tilling K, Taylor AE, Evans DM, Smith GD. Collider scope: When selection bias can substantially influence observed associations. *Int J Epidemiol*. 2018;47(1):226-235. doi:10.1093/ije/dyx206
53. Burgess S, Swanson SA, Labrecque JA. Are Mendelian randomization investigations immune from bias due to reverse causation? *Eur J Epidemiol*. 2021;36(3):253-257. doi:10.1007/s10654-021-00726-8
54. Elm E von, Altman DG, Egger M, Pocock SJ, Gøtzsche PC, Vandenbroucke JP. The Strengthening the Reporting of Observational Studies in Epidemiology (STROBE)

- statement: guidelines for reporting observational studies. *The Lancet*. 2007;370(9596):1453-1457. doi:10.1016/S0140-6736(07)61602-X
55. Skrivankova VW, Richmond RC, Woolf BAR, et al. Strengthening the reporting of observational studies in epidemiology using mendelian randomisation (STROBE-MR): explanation and elaboration. *BMJ*. 2021;375:n2233. doi:10.1136/bmj.n2233
  56. Zeeuw EL de, Voort L, Schoonhoven R, et al. Safe Linkage of Cohort and Population-Based Register Data in a Genomewide Association Study on Health Care Expenditure. *Twin Res Hum Genet*. 2021;24(2):103-109. doi:10.1017/thg.2021.18
  57. Burgess S, Smith GD, Davies NM, et al. Guidelines for performing Mendelian randomization investigations. Published online April 28, 2020. doi:10.12688/wellcomeopenres.15555.2
  58. Demange PA, Malanchini M, Mallard TT, et al. Investigating the genetic architecture of noncognitive skills using GWAS-by-subtraction. *Nat Genet*. 2021;53(1):35-44. doi:10.1038/s41588-020-00754-2
  59. Davies NM, Howe LJ, Brumpton B, Havdahl A, Evans DM, Davey Smith G. Within family Mendelian randomization studies. *Hum Mol Genet*. 2019;28(R2):R170-R179. doi:10.1093/hmg/ddz204
  60. Demange PA, Hottenga JJ, Abdellaoui A, et al. Estimating effects of parents' cognitive and non-cognitive skills on offspring education using polygenic scores. *Nat Commun*. 2022;13(1):4801. doi:10.1038/s41467-022-32003-x
  61. Bulik-Sullivan BK, Loh PR, Finucane HK, et al. LD Score regression distinguishes confounding from polygenicity in genome-wide association studies. *Nat Genet*. 2015;47(3):291-295. doi:10.1038/ng.3211
  62. Hemani G, Zheng J, Elsworth B, et al. The MR-Base platform supports systematic causal inference across the human phenome. Loos R, ed. *eLife*. 2018;7:e34408. doi:10.7554/eLife.34408
  63. R Core Team. R: A Language and Environment for Statistical Computing. Published online 2021. <https://www.R-project.org/>
  64. Burgess S, Labrecque JA. Mendelian randomization with a binary exposure variable: interpretation and presentation of causal estimates. *Eur J Epidemiol*. 2018;33(10):947-952. doi:10.1007/s10654-018-0424-6
  65. Greco M FD, Minelli C, Sheehan NA, Thompson JR. Detecting pleiotropy in Mendelian randomisation studies with summary data and a continuous outcome. *Stat Med*. 2015;34(21):2926-2940. doi:10.1002/sim.6522
  66. Burgess S, Thompson SG. Bias in causal estimates from Mendelian randomization studies with weak instruments. *Stat Med*. 2011;30(11):1312-1323. doi:10.1002/sim.4197

67. Bowden J, Fabiola Del Greco M, Minelli C, Smith GD, Sheehan NA, Thompson JR. Assessing the suitability of summary data for two-sample mendelian randomization analyses using MR-Egger regression: The role of the I<sup>2</sup> statistic. *Int J Epidemiol*. 2016;45(6):1961-1974. doi:10.1093/ije/dyw220
